# Supplementary material for: Establishment of a Comprehensive Inpatient Suicide Prevention Network by Using Health Care Failure Mode and Effect Analysis
Source: Atypon-hosted journal article supplement (doi:10.1176/appi.ps.201700512), 2019-04-05
Supplement: appi.ps.201700512.ds001.pdf [file appi.ps.201700512.ds001.pdf]

Table

## Failure modes and recommended actions

| Subprocess | Failure Mode                                  | Potential Cause                             | Scoring  |             |              | Recommended Action                                    |
|------------|-----------------------------------------------|---------------------------------------------|----------|-------------|--------------|-------------------------------------------------------|
|            |                                               |                                             | Severity | Probability | Hazard Score |                                                       |
| 2a         | 1. Screening unfinished                       | Not performed                               | 3        | 3           | 9            | Establishment of integrated electronic medical system |
|            |                                               | Not finished within 24 hours                | 2        | 3           | 6            | Establishment of integrated electronic medical system |
| 2b         | 2. Data not analyzed correctly                | Wrong calculation of the total score        | 3        | 2           | 6            | Staff continuing education                            |
| 2c         | 3. Process not performed according to results | In-charge team not being informed           | 4        | 2           | 8            | Establishment of integrated electronic medical system |
|            |                                               | Results not being recorded                  | 3        | 2           | 6            | Establishment of integrated electronic medical system |
| 2d         | 4. Results not presented during duty shifts   | No handover to on-duty staffs appropriately | 4        | 2           | 8            | Establishment of integrated electronic medical system |
| 2e         | 5. Inpatient safety and                       | Environment not being                       | 3        | 4           | 12           | Survey our ward setting                               |

|    |                                                   |                                                                                             |   |   |    |                                                                       |
|----|---------------------------------------------------|---------------------------------------------------------------------------------------------|---|---|----|-----------------------------------------------------------------------|
|    | environme<br>nt                                   | inspected                                                                                   |   |   |    | and avoid<br>access for<br>suicide                                    |
|    |                                                   | At-risk<br>patients' room<br>not being<br>adjusted                                          | 2 | 2 | 4  | Special alert<br>during shift<br>changes and<br>close monitor         |
| 3a | 6. Psychiatric<br>consultatio<br>n not<br>decided | Incompatible<br>opinion about<br>suicide risk<br>from in-charge<br>team                     | 4 | 3 | 12 | Establishment<br>of integrated<br>electronic<br>medical system        |
|    |                                                   | Patients or their<br>family refuse                                                          | 2 | 3 | 6  | Establishment<br>of integrated<br>electronic<br>medical system        |
| 3b | 7. Consultati<br>on<br>unfinished                 | No formal<br>consultation<br>record<br>including<br>suicide<br>assessment and<br>suggestion | 2 | 3 | 6  | Establishment<br>of integrated<br>electronic<br>medical system        |
| 5a | 8. Follow-up<br>not<br>administer<br>ed           | Lack of case<br>management                                                                  | 2 | 4 | 8  | A full-time<br>clinical<br>psychologist to<br>assist social<br>worker |
| 5b | 9. Case not                                       | Lack of case                                                                                | 2 | 4 | 8  | A full-time                                                           |

|  |                  |                   |  |  |  |                                                                  |
|--|------------------|-------------------|--|--|--|------------------------------------------------------------------|
|  | <b>concluded</b> | <b>management</b> |  |  |  | <b>clinical<br/>psychologist to<br/>assist social<br/>worker</b> |
|--|------------------|-------------------|--|--|--|------------------------------------------------------------------|

Fig. Inpatient suicide prevention process and sub-processes at E-Da hospital.

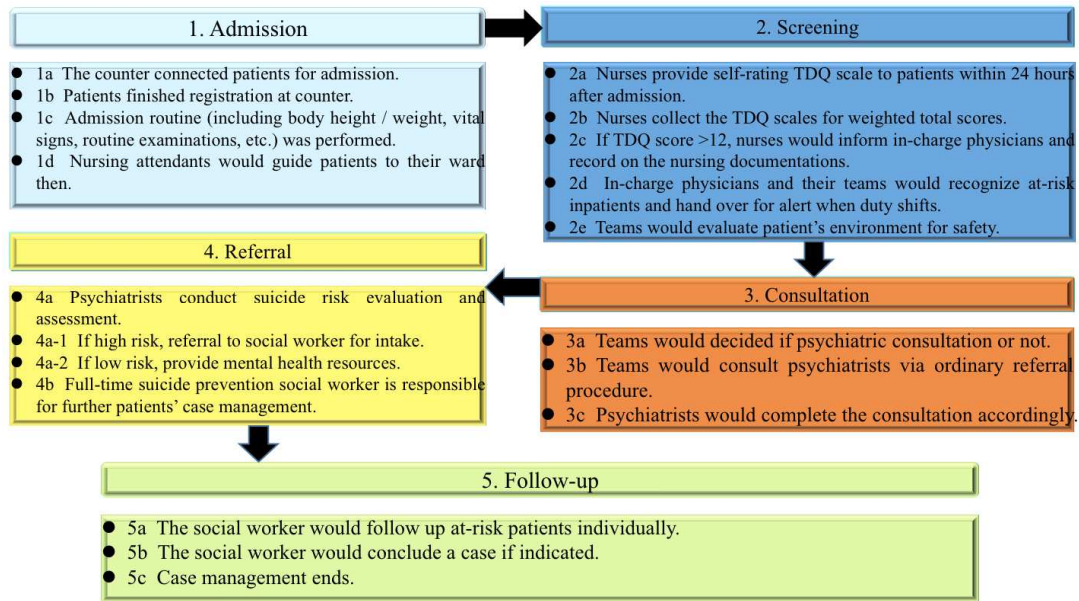

Fig. Annual psychiatric consultation rates before, during, and after HFMEA.

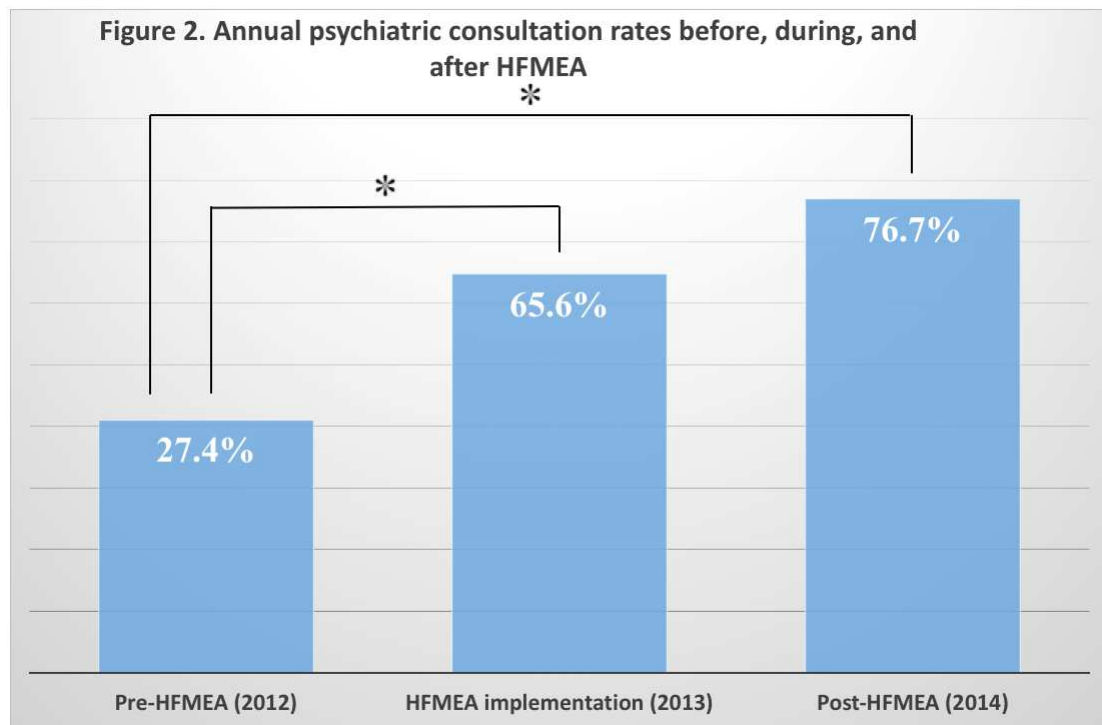

\* $p < 0.0001$
